# Supplementary material for: Prismatic Silver Nanoparticles Decorated on Graphene Oxide Sheets for Superior Antibacterial Activity
Source: MDPI journal article supplement (doi:10.3390/pharmaceutics14050924), 2022-04-24
Supplement: s1 [file s1]

## SUPPORTING INFORMATION

### Prismatic Silver Nanoparticles Decorated on Graphene Oxide Sheets for Superior Antibacterial Activity

Thi Tuong Vi Truong <sup>1,2</sup>, Chien-Chang Chen <sup>1,3#</sup>, Selvaraj Rajesh Kumar<sup>2</sup>, Chih-Chien Hu <sup>4</sup>,  
Dave W. Chen <sup>5</sup>, Yu-Kuo Liu <sup>2</sup> and Shingjiang Jessie Lue <sup>2,5,6, \*</sup>

<sup>1</sup> Division of Pediatric Gastroenterology and Hepatology, Department of Pediatrics, Chang Gung Memorial Hospital, Taoyuan 333, Taiwan; [truongthituongvi005@gmail.com](mailto:truongthituongvi005@gmail.com) (T.T.V.T.); [cgi2841@cgmh.org.tw](mailto:cgi2841@cgmh.org.tw) (C.-C.C.)

<sup>2</sup> Department of Chemical and Materials Engineering, Chang Gung University, Taoyuan City 333, Taiwan; [rajeshkumarnst@gmail.com](mailto:rajeshkumarnst@gmail.com) (S.R.K.); [ykliu@mail.cgu.edu.tw](mailto:ykliu@mail.cgu.edu.tw) (Y.-K.L.)

<sup>3</sup> College of Medicine, Chang Gung University, Taoyuan 333, Taiwan;

<sup>4</sup> Division of Joint Reconstruction, Department of Orthopedics, Chang Gung Memorial Hospital, Taoyuan 333, Taiwan; [chihchienhu@hotmail.com](mailto:chihchienhu@hotmail.com) (C.-C.H)

<sup>5</sup> Department of Orthopedic Surgery, Chang Gung Memorial Hospital, Keelung City 204, Taiwan; [mr5181@cgmh.org.tw](mailto:mr5181@cgmh.org.tw) (D.W.C)

<sup>6</sup> Department of Safety, Health and Environment Engineering, Ming-Chi University of Technology, New Taipei City 243, Taiwan

\* Correspondence: [jessie@mail.cgu.edu.tw](mailto:jessie@mail.cgu.edu.tw) (S.J.L); Tel.: +866-3-211-8800 (ext. 5489); Fax: +886-3-211-8700

# Contributed equally to first author

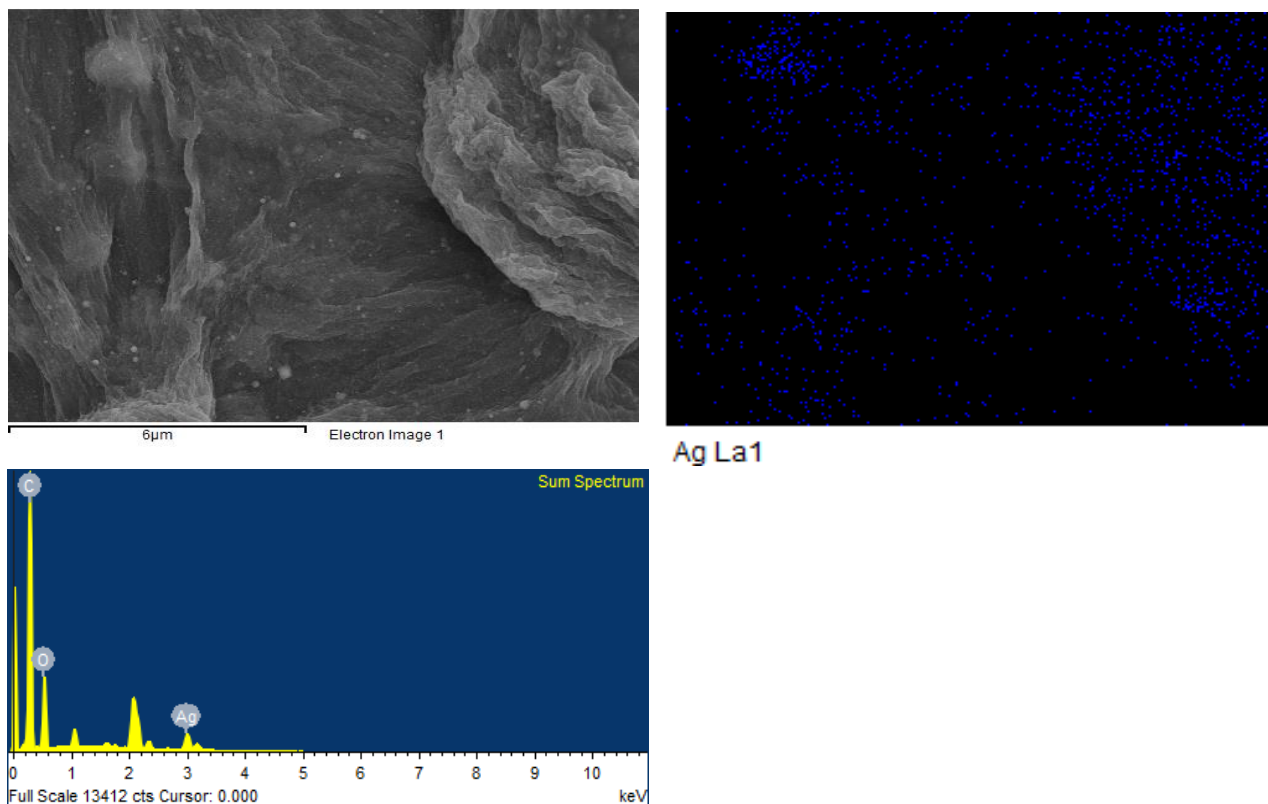

**Figure S1.** FESEM image and Ag mapping in GO-Ag NPs and elemental composition therein.

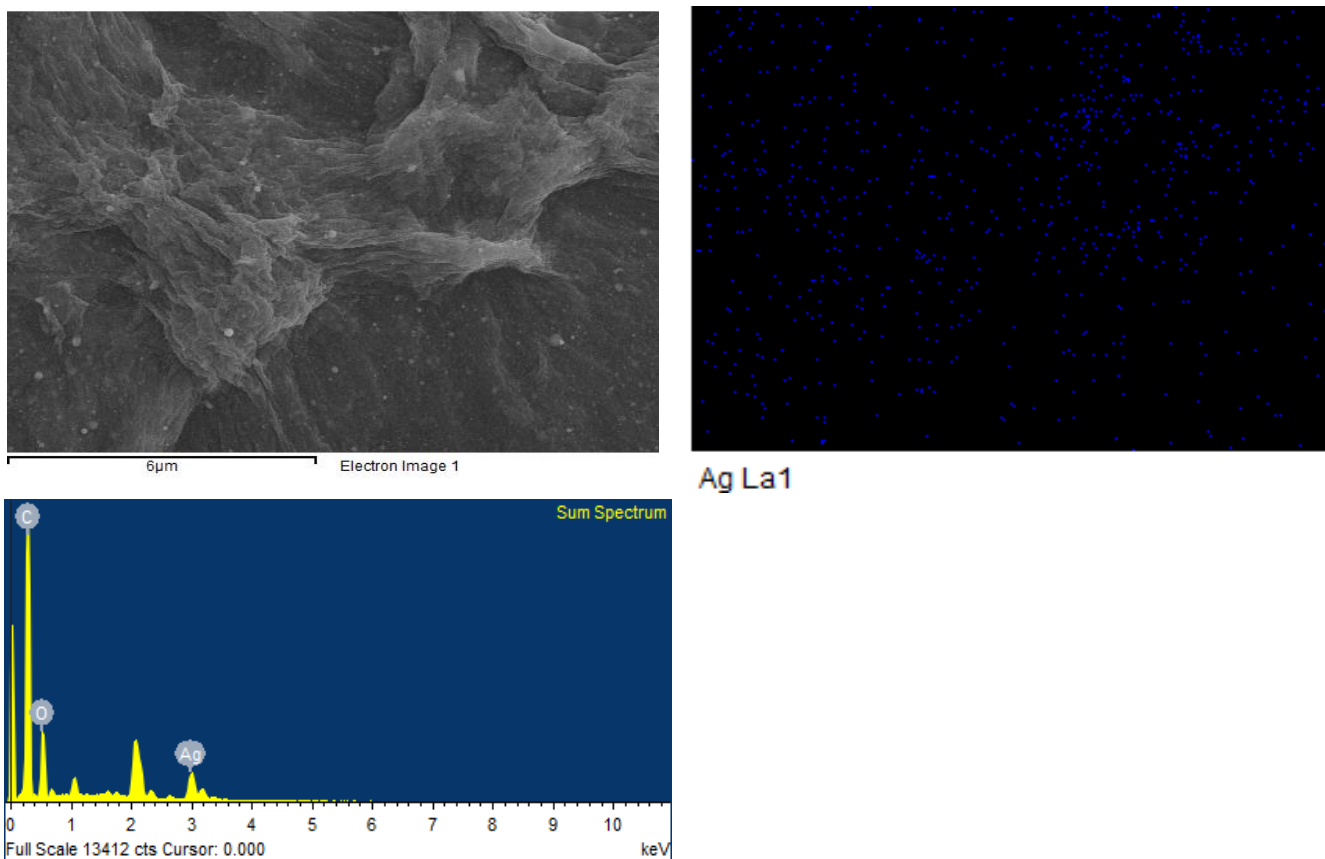

**Figure S2.** FESEM image and Ag mapping in GO-Ag NPrsms and elemental composition therein.

**Table S1.** Ag contents (% w/w) in GO-Ag NPs and GO-Ag NPrsms by TGA, EDS and XPS analyses.

| Sample    | TGA  | EDS  | XPS  |
|-----------|------|------|------|
| Ag NPs    | 29.6 | 29.1 | 25.9 |
| Ag NPrsms | 23.3 | 23.7 | 22.8 |

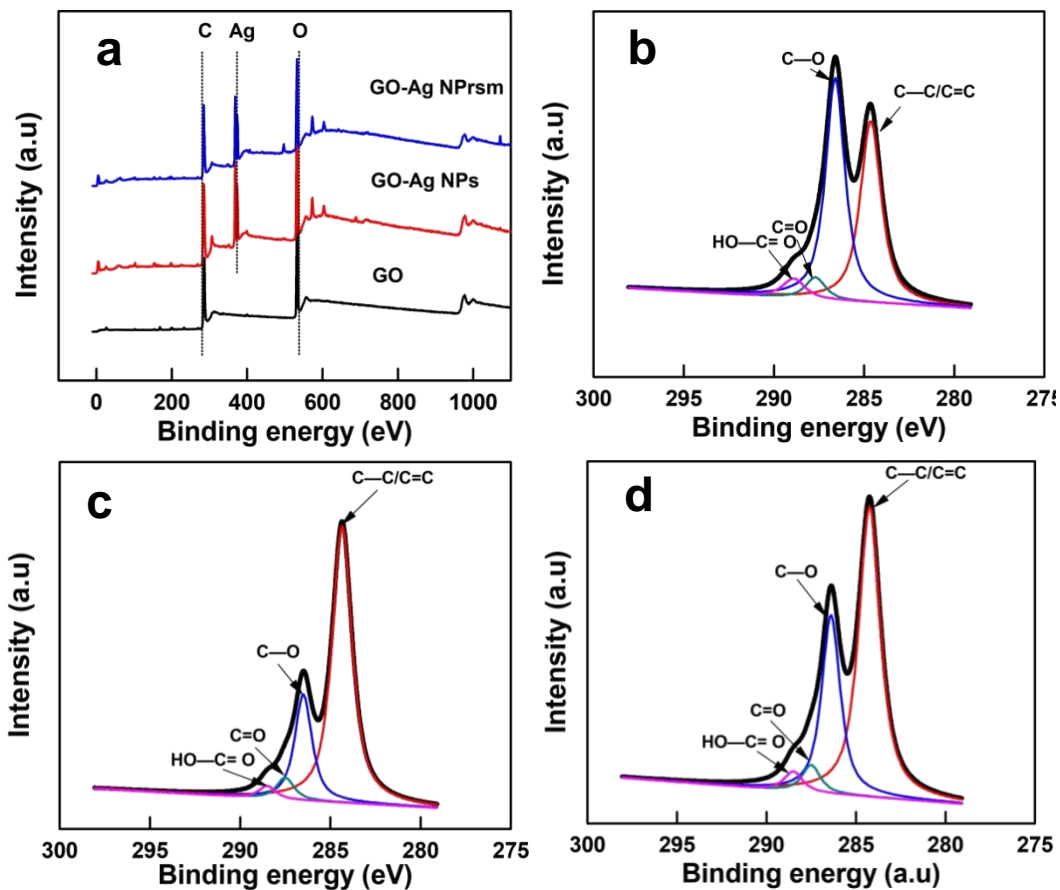

**Figure S3.** XPS full scans of GO, GO-Ag NPs and GO-Ag NPrsms (a); Detailed C1s scans and **deconvoluted peaks** of GO (b), GO-Ag NPs (c), and GO-Ag NPrsms (d).

**Table S2.** Carbon functional group contribution in GO, GO-Ag NPs, and GO-Ag NPrsms, determined from XPS C1s peak deconvolution (Figure S3).

| C bonding    | C=C  | C-O         | C=O        | O-C-O      |
|--------------|------|-------------|------------|------------|
| GO           | 42.3 | <b>48.1</b> | 4.8        | 4.8        |
| GO-Ag NPs    | 69.6 | 23.0        | <b>4.8</b> | <b>2.6</b> |
| GO-Ag NPrsms | 60.3 | <b>31.5</b> | <b>4.7</b> | <b>3.5</b> |

**Table S3.** Inhibition zone diameters on agar plates after *E. coli* and *S. aureus* exposure with nanomaterial samples.

| Bacteria         | Concentration           | GO           | Ag NPs       | Ag NPrsms    | GO-Ag NPs | GO-Ag NPrsms |
|------------------|-------------------------|--------------|--------------|--------------|-----------|--------------|
| <i>E. coli</i>   | 25 µg mL <sup>-1</sup>  | <sub>a</sub> | <sub>a</sub> | <sub>a</sub> | 11.0      | 14.0         |
|                  | 50 µg mL <sup>-1</sup>  | <sub>a</sub> | <sub>a</sub> | 11.0         | 13.0      | 13.5         |
|                  | 100 µg mL <sup>-1</sup> | 10.0         | 10.5         | 12           | 20        | 20.5         |
| <i>S. aureus</i> | 25 µg mL <sup>-1</sup>  | 10.0         | 11.0         | 11.0         | 15.0      | 18.0         |
|                  | 50 µg mL <sup>-1</sup>  | 11.0         | 12.0         | 13.0         | 22.0      | 23.0         |
|                  | 100 µg mL <sup>-1</sup> | 12.0         | 17.5         | 19.5         | 31.0      | 33.0         |

<sup>a</sup> <sub>a</sub> No inhibition zone was observed.

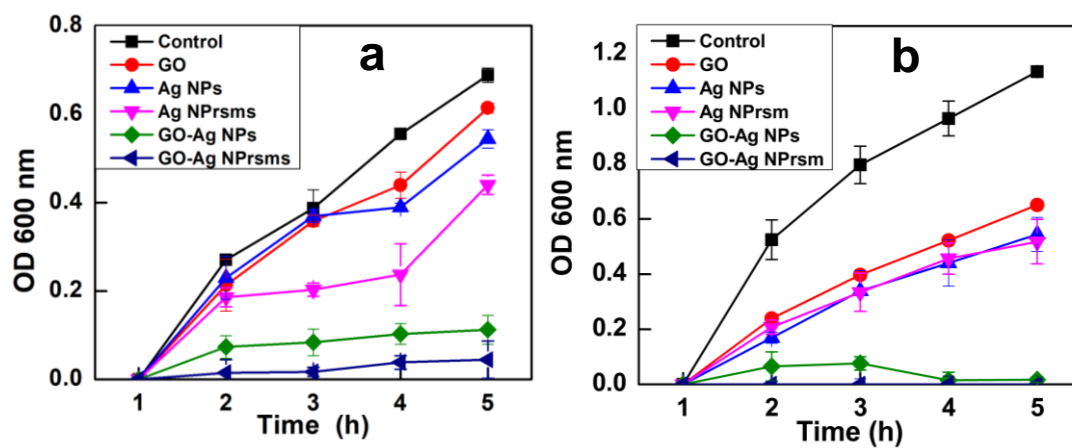

**Figure S4.** Time-dependent OD values of *E. coli* (a) and *S. aureus* (b) treated with nanomaterials at concentration of 100  $\mu\text{g mL}^{-1}$ .
